# Supplementary material for: The role of lateral pterygoid muscle in the traumatic temporomandibular joint ankylosis: A gene chip based analysis
Source: PubMed Central journal article supplement — Mol Med Rep. 2019 Mar 22;19(5):4297–305. doi: 10.3892/mmr.2019.10078 (PMC6471772; doi:10.3892/mmr.2019.10078), 2019-03-22
Supplement: Supplementary_Data.pdf [file Supplementary_Data.pdf]

Figure S1. Surgical procedure. (A) Exposure of the temporomandibular region. (B) Incision of the outside quarter of the joint disc. (C) Condyle sagittal fracture by piezosurgery. (D) The '#'-shaped groove was made by piezosurgery in the fossa surface. Gf, Joint fossa; Co, Condyle.

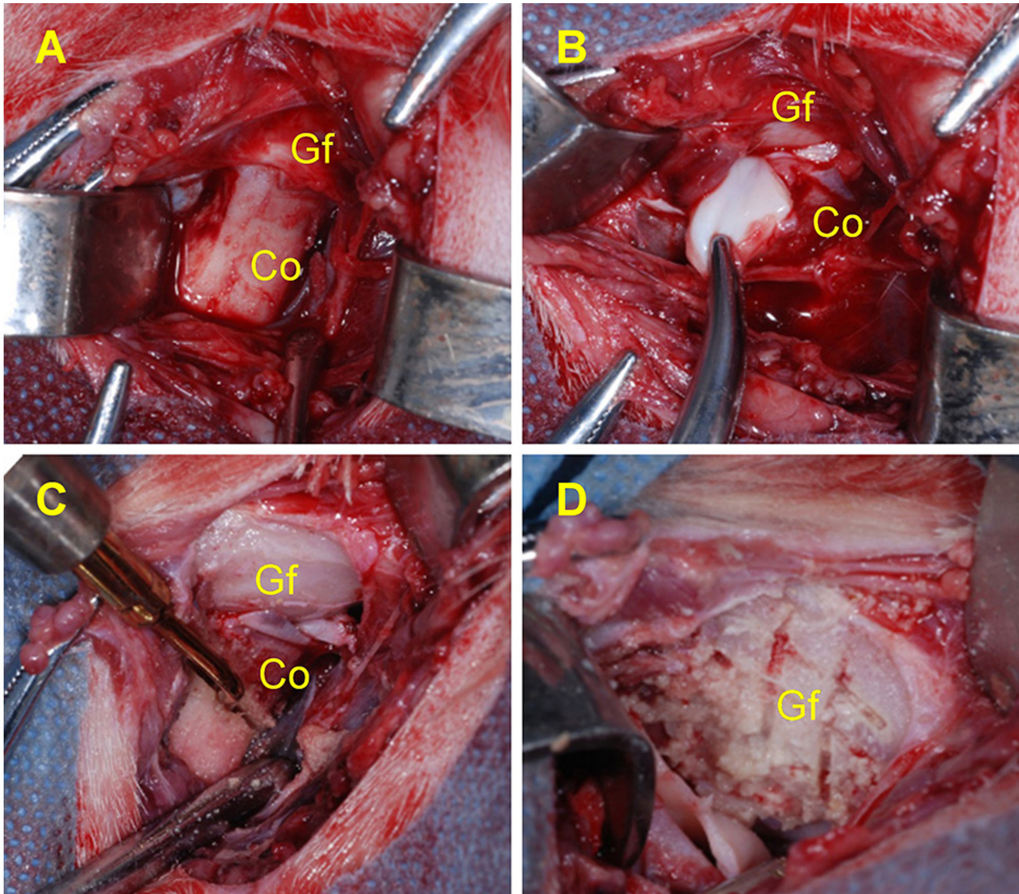

Table SI. The gene chip RNA samples information.

| Sample        | Conc. ( $\mu\text{g}/\mu\text{l}$ ) | Vol. ( $\mu\text{l}$ ) | Amount ( $\mu\text{g}$ ) | A260/A280 | 2100 Result |         | Result    |
|---------------|-------------------------------------|------------------------|--------------------------|-----------|-------------|---------|-----------|
|               |                                     |                        |                          |           | RIN         | 28S/18S |           |
| 4 weeks LPN1  | 0.168                               | 100                    | 16.81                    | 1.98      | 8.1         | 2.2     | Qualified |
| 4 weeks LPN2  | 0.222                               | 200                    | 44.38                    | 1.99      | 8.1         | 2.1     | Qualified |
| 4 weeks LPD1  | 0.194                               | 200                    | 38.88                    | 2.05      | 7.1         | 1.8     | Qualified |
| 4 weeks LPD2  | 0.211                               | 200                    | 42.16                    | 1.97      | 8.1         | 2.1     | Qualified |
| 4 weeks UTR1  | 0.138                               | 300                    | 41.49                    | 1.94      | 7.2         | 2.0     | Qualified |
| 4 weeks UTR2  | 0.118                               | 100                    | 11.84                    | 1.99      | 7.8         | 2.1     | Qualified |
| 12 weeks LPN1 | 0.211                               | 100                    | 21.09                    | 1.97      | 7.6         | 1.9     | Qualified |
| 12 weeks LPN2 | 0.233                               | 200                    | 46.50                    | 2.02      | 8.2         | 1.9     | Qualified |
| 12 weeks LPD1 | 0.312                               | 200                    | 62.40                    | 1.90      | 7.4         | 1.9     | Qualified |
| 12 weeks LPD2 | 0.183                               | 200                    | 36.54                    | 2.06      | 7.2         | 2.3     | Qualified |
| 12 weeks UTR1 | 0.103                               | 200                    | 20.58                    | 2.01      | 8.1         | 2.3     | Qualified |
| 12 weeks UTR2 | 0.075                               | 300                    | 22.50                    | 1.96      | 7.6         | 3.8     | Qualified |

LPN, the lateral pterygoid muscle was normal; LPD, the lateral pterygoid muscle was dissected; UTR, Sham surgery without treatment.

Table SII. Abbreviations of biological process in Gene Ontology-enrichment analysis.

| Biological process                                                  | Abbreviation      |
|---------------------------------------------------------------------|-------------------|
| Bone morphogenesis                                                  | BM                |
| Cartilage development involved in endochondral bone morphogenesis   | CEBM              |
| Endochondral bone growth                                            | EBG               |
| Muscle contraction                                                  | MC                |
| Positive regulation of NF- $\kappa$ B transcription factor activity | NF- $\kappa$ B TF |
| Ossification involved in bone maturation                            | OBM               |
| Wnt signaling pathway involved in somitogenesis                     | WNT pathway       |
| Cellular response to chemical stimulus                              | CRCS              |
| Negative regulation of ossification                                 | NRO               |
| Cartilage development                                               | CD                |
| Response to external stimulus                                       | RES               |
| Response to stress                                                  | RS                |
| Immune response                                                     | IR                |
| Toll-like receptor signaling pathway                                | TLR pathway       |
| Endochondral bone morphogenesis                                     | EBM               |
| Bone development                                                    | BD                |
| Response to mechanical stimulus                                     | RMS               |
| Muscle structure development                                        | MSD               |
| Cellular response to endogenous stimulus                            | CRES              |

Table SIII. The primers sequence used for Reverse transcription-quantitative polymerase chain reaction.

| Gene  | Forward (5'-3')          | Reverse (5'-3')        |
|-------|--------------------------|------------------------|
| BMP7  | AGGAGGGCTGGCTCGTTTT      | TGGGGTTGATGCTCTGTCC    |
| CALCR | GCCAGTTCAGATTCCACCTACTCT | TACCAAACCCCATCTTCCTCAC |
| FOS   | CCTTCTCCAGCATGGGTTCT     | GTCACTGTTGGGATGAAGTTGG |
| LECT1 | GAGGGGAAAAGTGCTACATCAAA  | CAGCCACCCAGATGAGAGAA   |
| RPL19 | AGCCTGTGACTGTCCATTCC     | ACGTTACCTTCTCGGGCATT   |

BMP, bone morphogenic protein; RPL19, ribosomal protein L19; LECT1, chondromodulin; FOS, Fos proto-oncogene, AP-1 transcription factor subunit; CALCR, calcitonin receptor.
